# 1 **Adapterama I: Universal stubs and primers for 384** 2 **unique dual-indexed or 147,456 combinatorially-** 3 **indexed Illumina libraries (iTru & iNext)**

4  
5 Travis C. Glenn<sup>1-5</sup>, Roger A. Nilsen<sup>4,φ</sup>, Troy J. Kieran<sup>1</sup>, Jon G. Sanders<sup>6,‡</sup>, Natalia J. Bayona-  
6 Vázquez<sup>1</sup>, John W. Finger Jr.<sup>1,2,θ</sup>, Todd W. Pierson<sup>1,§</sup>, Kerin E. Bentley<sup>3,#</sup>, Sandra L. Hoffberg<sup>3,ψ</sup>,  
7 Swarnali Louha<sup>5</sup>, Francisco J. García-De León<sup>7</sup>, Miguel Angel Del Río-Portilla<sup>8</sup>, Kurt D. Reed<sup>9</sup>,  
8 Jennifer L. Anderson<sup>10</sup>, Jennifer K. Meece<sup>10</sup>, Samuel E. Aggrey<sup>5,11</sup>, Romdhane Rekaya<sup>5,12</sup>,  
9 Magdy Alabady<sup>4,13</sup>, Myriam Bélanger<sup>4,14</sup>, Kevin Winker<sup>15</sup>, and Brant C. Faircloth<sup>16</sup>

10  
11 <sup>1</sup> Department of Environmental Health Science, University of Georgia, Athens, GA 30602, USA

12 <sup>2</sup> Interdisciplinary Toxicology Program, University of Georgia, Athens, GA 30602, USA

13 <sup>3</sup> Department of Genetics, University of Georgia, Athens, GA 30602, USA

14 <sup>4</sup> Georgia Genomics and Bioinformatics Core, University of Georgia, Athens, GA 30602, USA

15 <sup>5</sup> Institute of Bioinformatics, University of Georgia, Athens, GA 30602, USA

16 <sup>6</sup> Department of Pediatrics, School of Medicine, University of California San Diego, La Jolla,  
17 CA 92093, USA

18 <sup>7</sup> Laboratorio de Genética para la Conservación, Centro de Investigaciones Biológicas del  
19 Noroeste, SC, Instituto Politécnico Nacional 195, Playa Palo de Santa Rita Sur, La Paz,  
20 B.C.S., C.P. 23096, México

21 <sup>8</sup> Centro de Investigación Científica y de Educación Superior de Ensenada (CICESE). Carretera  
22 Ensenada-Tijuana #3918. Zona Playitas, Ensenada Baja California, 22860, México

23 <sup>9</sup> Department of Pathology and Laboratory Medicine, University of Wisconsin, Madison, WI  
24 53792, USA

25 <sup>10</sup> Integrated Research and Development Laboratory, Marshfield Clinic Research Institute,  
26 Marshfield, WI 54449, USA

27 <sup>11</sup> Department of Poultry Science, University of Georgia, Athens, GA 30602, USA

28 <sup>12</sup> Department of Animal and Dairy Science, University of Georgia, Athens, GA 30602, USA

29 <sup>13</sup> Department of Plant Biology, University of Georgia, Athens, GA 30602, USA

30 <sup>14</sup> Department of Infectious Diseases, University of Georgia, Athens, GA 30602, USA

31 <sup>15</sup> University of Alaska Museum, 907 Yukon Drive, Fairbanks, AK 99775, USA

32 <sup>16</sup> Department of Biological Sciences and Museum of Natural Science, Louisiana State  
33 University, Baton Rouge, LA 70803, USA

34  
35 <sup>φ</sup> current address: Department of Small Animal Medicine, College of Veterinary Medicine,  
36 University of Georgia, Athens, GA 30602, USA

37 <sup>‡</sup> current address: Cornell Institute for Host–Microbe Interaction and Disease, Cornell  
38 University, Ithaca, NY 14850

39 <sup>o</sup> current address: Department of Biological Sciences, Auburn University, Auburn, AL 36849,  
40 USA

41 <sup>§</sup> current address: Department of Ecology and Evolutionary Biology, University of Tennessee,  
42 Knoxville, TN 37996, USA

43 <sup>#</sup> current address: LeafWorks Inc., 125 South Main Street #150, Sebastopol, CA 95472, USA

44 <sup>ψ</sup> current address: Department of Ecology, Evolution, and Environmental Biology, Columbia  
45 University, New York, NY 10027, USA

46

47 Corresponding Authors:

48 Travis Glenn

49 Dept. of EHS, Environmental Health Science Bldg., University of Georgia, Athens, GA 30602,  
50 USA

51 Email address: [travisg@uga.edu](mailto:travisg@uga.edu)

52

53 Brant Faircloth

54 Dept. of Biological Sciences and Museum of Natural Science, Louisiana State University, Baton  
55 Rouge, LA 70803, USA

56 Email address: [brant@faircloth-lab.org](mailto:brant@faircloth-lab.org)

57

## 58 **Abstract**

59 Next-generation DNA sequencing (NGS) offers many benefits, but major factors limiting NGS  
60 include reducing costs of: 1) start-up (i.e., doing NGS for the first time); 2) buy-in (i.e., getting  
61 the smallest possible amount of data from a run); and 3) sample preparation. Reducing sample  
62 preparation costs is commonly addressed, but start-up and buy-in costs are rarely addressed. We  
63 present dual-indexing systems to address all three of these issues. By breaking the library  
64 construction process into universal, re-usable, combinatorial components, we reduce all costs,  
65 while increasing the number of samples and the variety of library types that can be combined  
66 within runs. We accomplish this by extending the Illumina TruSeq dual-indexing approach to  
67 768 (384 + 384) indexed primers that produce 384 unique dual-indexes or 147,456 (384 x 384)  
68 unique combinations. We maintain eight nucleotide indexes, with many that are compatible with  
69 Illumina index sequences. We synthesized these indexing primers, purifying them with only  
70 standard desalting and placing small aliquots in replicate plates. In qPCR validation tests, 206 of  
71 208 primers tested passed (99% success). We then created hundreds of libraries in various  
72 scenarios. Our approach reduces start-up and per-sample costs by requiring only one universal  
73 adapter that works with indexed PCR primers to uniquely identify samples. Our approach  
74 reduces buy-in costs because: 1) relatively few oligonucleotides are needed to produce a large  
75 number of indexed libraries; and 2) the large number of possible primers allows researchers to  
76 use unique primer sets for different projects, which facilitates pooling of samples during  
77 sequencing. Our libraries make use of standard Illumina sequencing primers and index sequence  
78 length and are demultiplexed with standard Illumina software, thereby minimizing customization

79 headaches. In subsequent *Adapterama* papers, we use these same primers with different adapter  
80 stubs to construct amplicon and restriction-site associated DNA libraries, but their use can be  
81 expanded to any type of library sequenced on Illumina platforms.

82

83

## 84 **Introduction**

85 Next-generation sequencing (NGS) has transformed the life sciences. The unprecedented amount  
86 of sequence data generated by NGS platforms facilitates new approaches, techniques, and  
87 discoveries (Ansorge, 2009; Tautz, Ellegren & Weigel, 2010). Reduced costs (Glenn, 2011,  
88 2016) are a major component of NGS success because cost reduction enables many studies that  
89 were previously infeasible. Although NGS costs per read have dropped tremendously, the  
90 minimum cost to obtain any amount of NGS data (i.e., the minimum buy-in cost) remains high,  
91 particularly when researchers want to collect small amounts of DNA sequence data from large  
92 numbers of individual samples in a single run. These buy-in costs are largely driven by the  
93 money required to purchase adapters containing unique identifying sequences that allow tagging  
94 and tracking of samples sequenced in multiplex (Box 1). For example, the purchase price for a  
95 subset of 96, single-index, TruSeq-equivalent adapters described in Faircloth & Glenn (2012)  
96 would require an initial investment of at least \$3,161 (US; \$11,321 with TruGrade<sup>®</sup> purification),  
97 and this investment is exclusive of the additional costs to purchase other necessary library  
98 preparation reagents and consumables. A second problem for researchers wishing to collect  
99 smaller amounts of sequence data from many samples sequenced in multiplex is the relatively  
100 limited number of indexed adapters that are available. Although several publications (e.g., Meyer  
101 & Kircher, 2010; Faircloth & Glenn, 2012; Rohland & Reich, 2012) and commercial products  
102 (e.g., Illumina Nextera, Illumina, San Diego, CA, USA; Bioo Scientific NEXTflex-HT, Bioo  
103 Scientific, Austin, TX, USA) provide schemes for indexing hundreds of individuals sequenced in  
104 multiplex, most of these approaches do not facilitate individually tagging many thousands of  
105 samples at low cost so that samples can be pooled into a single sequencing run. Given the  
106 increasing capacity of high-end Illumina instruments (e.g., Illumina NovaSeq), this is a  
107 significant and growing issue. A third constraint that has long been known (Kircher, Sawyer &  
108 Meyer, 2012) is that Illumina instruments can mismatch the read(s) and index sequence(s) by  
109 hopping or swapping indexes (Sinha et al., 2017; Costello et al., 2018), causing sequence  
110 misidentification and other problems. Uniquely tagging each index position significantly reduces  
111 these problems (Kircher, Sawyer & Meyer, 2012; Illumina, 2017; Costello et al., 2018). As a  
112 result, library preparation methods that reduce costs while simultaneously increasing the number  
113 of samples that can be tagged and sequenced together would benefit many types of research.

114 In this first paper of the *Adapterama* series, we present the key components of an  
115 integrated system for producing 384 uniquely dual-indexed (or 147,456 combinatorially-  
116 indexed) Illumina libraries at low cost (Figs. 1, S1). We build this integrated system on top of  
117 previous developments introduced by Illumina (2008) and others (e.g., Meyer & Kircher, 2010;  
118 Fisher et al., 2011), and we show that it is possible to significantly reduce library preparation

119 costs by changing from full-length adapters that incorporate tags in the Illumina TruSeq strategy  
120 to shorter universal adapter stubs and indexing primers (hereafter referred to as the iTru strategy;  
121 which is similar to the original Illumina indexing strategy [Illumina 2008]). Simply moving from  
122 a TruSeq indexing strategy to the iTru indexing strategy, while maintaining a single indexing  
123 position, can reduce costs by more than 50% (Table 1). When taking advantage of the dual-  
124 indexing offered by our iTru strategy, researchers can reduce costs by at least an order of  
125 magnitude relative to TruSeq (Table 1). This method is also extensible to the Illumina Nextera  
126 adapter sequences (Syed, Grunenwald & Caruccio, 2009; Adey et al., 2010), hereafter referred to  
127 as the iNext approach (Figs. S1-S2; File S1). We focus on describing the iTru system because  
128 TruSeq is more commonly used than Nextera and to simplify presentation of the system (details  
129 of the iNext system are generally given in the supplemental figures and files). In subsequent  
130 *Adapterama* manuscripts, we extend the system presented here for a variety of applications (e.g.,  
131 amplicon sequencing and RADseq), but we use our iTru or iNext indexing primers throughout  
132 (Fig. S1).

133 Here we outline the ideas underlying genomic library construction for Illumina  
134 sequencers, and we provide some historical perspective on Illumina library preparation for  
135 researchers new to Illumina sequencing. Following this introduction, we describe our iTru  
136 design, which modifies Illumina's original library construction method and extends the approach  
137 to include indexes on both primers (i.e., double-indexing; *c.f.*, Kircher, Sawyer & Meyer, 2012).  
138 The iTru method (Figs. 1-3) produces: 1) libraries that are compatible with all Illumina  
139 sequencing instruments and reagents; 2) libraries that can be pooled (i.e., multiplexed) with other  
140 Illumina libraries; 3) libraries that can be sequenced using standard Illumina sequencing primers  
141 and protocols; and 4) data that can be demultiplexed with standard Illumina software packages  
142 and pipelines.

143

#### 144 ***Illumina libraries***

145 DNA molecules that can be sequenced on Illumina instruments require specific primer-binding  
146 sites (i.e., adapters; Box 1) on each end. The procedure to incorporate the adapters to the DNA  
147 insert is generally referred to as "library preparation". Library preparation of genomic DNA, in  
148 its most common form, involves randomly shearing DNA to a desired size range (e.g., 200-600  
149 bp); end-repairing and adenylating the sheared DNA; adding synthetic, double-stranded adapters  
150 onto each end of the adenylated DNA molecules using T/A ligation; and using limited-cycle  
151 PCR amplification to increase the copy number of valid constructs (Figs. 1-3, S3; *c.f.* Fig. S2;  
152 Fig. S4).

153 Illumina library preparations differed from their early competitors (chiefly 454) because  
154 their double-stranded adapters used a Y-yoke design to increase library construction efficiency  
155 (Bentley et al., 2008; Greigite, 2009). The Y-yoke structure of the adapters allows each starting  
156 DNA molecule to serve as two templates, requiring  $\geq 3$  cycles of PCR to produce complete  
157 double-stranded library molecules (Fig. S3). The DNA molecules resulting from these  
158 preparations (Figs. 1-3; Fig. S4) contain: 1) outer primer-binding sites (P5 and P7) used to

159 capture individual DNA molecules on the surface of Illumina flow cells and clonally amplify  
160 them; 2) separate primer-binding sites (Read 1 and Read 2), located internal to the P5 and P7  
161 sites, that allow directional sequencing of both DNA strands; and 3) short DNA sequences,  
162 known as indexes (Box 1; see below), inserted into the P7 side of the adapter molecule (Illumina,  
163 2008; Fig. 4, i7 index, sequence obtained from Index Read 1; the i5 index was added  
164 subsequently, see below).

165

### 166 *Indexing*

167 Indexing strategies are generally meant to individually identify different DNA samples by  
168 incorporating unique DNA sequences into the library constructs (Shoemaker et al., 1996;  
169 Binladen et al., 2007; Glenn et al., 2007; Hoffmann et al., 2007; Meyer et al., 2007; Craig et al.,  
170 2008). Indexed libraries can then be pooled together (multiplexed) in a single sequencing lane.  
171 During sequencing, individual molecules are captured on the surface of the Illumina flow cells,  
172 the individual molecules are clonally amplified, and up to four separate sequencing reactions  
173 take place sequentially, each creating a separate sequencing read (Fig. 4). After sequencing,  
174 computer software matches the observed index sequence for each molecule to a list of samples  
175 with expected indexes (i.e., using a sample sheet; File S2) and parses the bulk data back into its  
176 component parts (i.e., demultiplexing, e.g., using bcl2fastq [Illumina, 2017]).

177 In practice, the history and current status of Illumina indexing strategies is quite  
178 complicated (e.g., Illumina, 2018a), with several transitions among different adapter systems that  
179 resulted from changing capabilities of sequencing instruments. Illumina originally created 12  
180 different i7 indexes (Fig. 1; Figs. 3-4) to allow pooling of up to 12 samples, and the company  
181 later increased the number of i7 indexes for certain applications to 48. The original Illumina i7  
182 indexes had a length of six nucleotides (nt) and were constructed such that  $\geq 2$  substitution errors  
183 were needed to turn one index into another—an effort to minimize sample confusion as a result  
184 of sequencing error. Sequencing errors on Illumina instruments are primarily substitutions; thus,  
185 Illumina's initial indexes were designed to be robust to substitution sequencing errors. Deletions,  
186 however, are the primary errors of oligonucleotide synthesis (i.e., synthesis of the adapters  
187 and/or primers used to make the indexed libraries). It is, therefore, desirable to have indexes that  
188 are robust to insertions and deletions (indels) as well as substitutions, thus conforming to an edit-  
189 distance metric and limiting the assignment of sequences to the wrong sample (Faircloth &  
190 Glenn, 2012). When index sets have edit-distances  $\geq 3$ , then error correction can be employed,  
191 but this distance criterion is frequently violated (Faircloth & Glenn, 2012).

192 Building upon earlier in-house and external efforts, Illumina introduced a product  
193 (Nextera kits) that used an i5 index and an i7 index (i.e., dual-indexing; see Box 1, Fig. 1, and  
194 below) each of which were longer (8 nt) and, at that time, conformed to the edit-distance metric.  
195 Nextera adapters use the same sequences for interaction with the flow-cell (i.e., P5 and P7; Fig.  
196 1), but have unique Read 1 and Read 2 sequences relative to TruSeq (Fig. S2; Fig. S4). Thus,  
197 Illumina does not recommend combining Nextera and TruSeq libraries within a single  
198 sequencing lane (Illumina, 2012; but see below). Illumina subsequently incorporated 8 nt, dual

199 indexes into the TruSeq system with their release of TruSeqHT. Although the Illumina  
200 TruSeqHT indexes are robust to insertion, deletion, and substitution errors, the updated  
201 TruSeqHT i7 indexes do not maintain an edit-distance  $\geq 3$ , when compared to other TruSeq HT i7  
202 indexes in the same set or when combined with all previous Illumina i7 indexes, and so do not  
203 allow proper error correction (Fig. S5; File S3). Regardless, the TruSeqHT indexing system is  
204 more robust, accurate, and flexible than previous approaches, and researchers can index template  
205 DNA molecules using the i7 indexes alone (single-indexing) or in combination with i5 indexes  
206 (dual-indexing).

207 Dual indexing on the Illumina platform means that indexes can be used combinatorially  
208 (Kircher, Sawyer & Meyer, 2012; Faircloth & Glenn, 2012). Major advantages of the dual-  
209 indexing strategy include: 1) the need for fewer oligonucleotides to index the same number of  
210 samples in multiplex (e.g.,  $8 + 12 = 20$  primers produce  $8 \times 12 = 96$  unique tag combinations); 2)  
211 concomitantly reducing the cost of production, inventory, and quality control (QC) (i.e., it is less  
212 expensive to produce, maintain stocks of, and do QC on 20 primers than 96); and 3) the  
213 universality of the approach—dual-indexing is compatible with both full-length adapters (e.g.,  
214 TruSeqHT libraries) or universal adapter stubs and primers (e.g., Nextera, iNext, or iTru). As  
215 noted above, combinatorial indexing is susceptible to index hopping which results in sequences  
216 being assigned to the incorrect samples, whereas using unique sequences at multiple index  
217 positions (e.g., unique dual-indexes) significantly reduces these problems (Kircher, Sawyer, &  
218 Meyer, 2012; Illumina, 2017; Costello et al., 2018).

219

### 220 *Illumina-compatible libraries*

221 Illumina's libraries have been the industry's gold standard for sequence quality on Illumina  
222 platforms, but their library preparation kits are among the most expensive available. The number  
223 of indexes offered by Illumina was limited to  $\leq 48$  and the number of dual-index combinations  
224  $\leq 96$ , until subsequent releases of additional indexes for the Nextera system, which can dual-  
225 index up to 384 samples (Illumina, 2018b). Most recently, Illumina has partnered with Integrated  
226 DNA Technologies, Inc. (IDT, Coralville, IA, USA) to develop a set of 192 ( $96 + 96$ ) indexed  
227 adapters that also contain unique molecular identifiers

228 ([https://support.illumina.com/downloads/idt-illumina-truseq-ud-indexes-sample-sheet-](https://support.illumina.com/downloads/idt-illumina-truseq-ud-indexes-sample-sheet-templates.html)  
229 [templates.html](https://support.illumina.com/downloads/idt-illumina-truseq-ud-indexes-sample-sheet-templates.html); UMIs, Box1) to improve multiplexing, mitigate sample misassignment due to  
230 index hopping, and detect PCR duplicates (IDT, 2018; MacConaill et al., 2018). Alternative  
231 commercial kits have been produced to increase efficiency, reduce GC bias (Aird et al., 2011;  
232 Kozerewa et al., 2009), and/or increase the number of indexes, but costs remain high and the  
233 total number of commercially available indexes still generally remains  $\leq 384$ .

234 A variety of library preparation methods have also been described by research groups that  
235 reduce per-sample costs relative to most commercial kits (e.g., Meyer & Kircher, 2010 [MK-  
236 2010]; Fisher et al., 2011 [F-2011]; see Head et al., 2014 for others). The MK-2010 and F-2011  
237 methods are in widespread use, but they do have some shortcomings. For example, the MK-2010  
238 method: 1) specifies HPLC purification of adapter oligonucleotides, which increases start-up

239 costs dramatically and can lead to contamination from previous oligonucleotides that were  
240 purified on the same HPLC columns; 2) relies on hairpin suppression of molecules with identical  
241 adapter ends (instead of using a Y-yoke adapter) which is efficient with smaller inserts (e.g.,  
242 <200 bp) but loses efficiency with increasing insert length; and 3) relies on blunt-ended ligation,  
243 which allows the formation of chimeric inserts. The F-2011 method introduced the idea of “on-  
244 bead” library preparation, which increases efficiency and reduces costs; thus, many commercial  
245 kits have subsequently incorporated similar on-bead library preparation approaches. Limitations  
246 of the F-2011 method include use of: 1) custom NEB reagents, not in the standard catalog or  
247 available in small quantities; 2) large volumes of enzymes; and 3) Illumina adapters and primers,  
248 which increase costs and limit the number of samples that can be pooled.

249 Our approach builds upon many of the previous approaches introduced by Illumina, MK-  
250 2010, F-2011, Rohland & Reich (2012), and others to develop library preparation methods for  
251 genomic DNA that overcome many of these limitations. We describe adapters, primers, and  
252 library construction methods that produce DNA molecules equivalent to and compatible with  
253 Illumina’s TruSeqHT libraries (and, separately, Nextera libraries, see File S1; Table 2). Our  
254 method extends the number of available index combinations from 96 x 96 to 384 x 384, while  
255 maintaining a minimum edit-distance of  $\geq 3$  between all indexes. We demonstrate the  
256 effectiveness of our combinatorial indexing primers by controlled quantitative PCR experiments,  
257 and we demonstrate the utility of our system by preparing and sequencing iTru libraries from  
258 organisms with varying genome size and DNA quality.

259

## 260 **Materials & Methods**

### 261 *Adapter and primer design*

262 We modified the Illumina TruSeq system by dividing the adapter components into two parts: 1) a  
263 universal Y-yoke adapter “stub” that comprises parts of the Read 1 and Read 2 primer binding  
264 sites plus the Y-yoke; and 2) a set of amplification primers (iTru5, iTru7), parts of which are  
265 complementary to the Y-yoke stub and which also contain custom sequence tag(s) for sample  
266 indexing (Fig. 1; Fig. 3; Table 3; File S4) as well as the sequences (P5, P7) necessary for clonal  
267 amplification on Illumina flow cells. The iTru Y-yoke adapter has a single 5’ thymidine (T)  
268 overhang and can be used in standard library preparations that produce insert DNA with single 3’  
269 adenosine (A) overhangs. We designed a large set of indexed amplification primers (iTru5,  
270 iTru7; File S4) that contain a subset of our custom 8 nt sequence tags (from Faircloth & Glenn,  
271 2012), as well as an initial set that incorporated the TruSeq HT indexes (i.e., D5xx for iTru5 and  
272 D7xx for iTru7) which could serve as controls. All iTru5 indexes are compatible with Illumina  
273 indexes. Some of the iTru7 indexes are not compatible with Illumina indexes (i.e., edit-distance  
274 is  $\leq 2$ ). We grouped the iTru primers with our sequence tags into clearly identifiable, numbered  
275 sets (100 and 300 series) that are compatible with 8 nt indexes in the standard Illumina  
276 TruSeqHT primers, as well as Illumina v2 8 nt indexes (including the 6 nt indexes converted to 8  
277 nt via addition of invariant bases from the adapter). We also created several additional numbered  
278 sets (200 and 400 series) of iTru primers that are compatible with all other primers and sequence

279 tags in our iTru system, but which are not compatible with all Illumina indexes. We then  
280 balanced the base composition of all iTru primers in all numbered sets in groups of eight for  
281 iTru5 and groups of 12 for iTru7, because balanced base composition is critical for successful  
282 index sequencing (Illumina, 2016; see Discussion for additional information on combining small  
283 numbers of libraries).

284 We ordered the components of our Y-yoke adapter stubs and iTru primers from IDT,  
285 with standard desalting purification only. We modified the adapter stub sequence by  
286 phosphorylating the 5' end of iTru\_R2\_stub\_RCp oligonucleotide (Fig. 1; Table 3), and we  
287 modified each of the iTru primer sequences by adding a phosphorothioate bond (Eckstein, 1985)  
288 before the 3' nucleotide of each sequence to inhibit degradation due to the exonuclease activity  
289 of proof-reading polymerases (Skerra, 1992), which are commonly used in library preparation.  
290 Following initial small-scale orders, we ordered sets of iTru primers, placing the iTru5 and iTru7  
291 primers into every other column (iTru5) or row (iTru7) of 96-well plates, with 0.625 or 1.25  
292 nmol aliquots in replicate plates (Files S4-S5). We hydrated newly synthesized primers to 10  $\mu$ M  
293 in the plate and 5  $\mu$ M prior to use (File S6). Subsequently, we ordered the complete set of 384  
294 iTru5 and 384 iTru7 primers in 96-well plates with 1.25 nmol aliquots (Files S4-S5).

295

### 296 ***Validation of iTru primers by quantitative PCR (qPCR)***

297 To determine whether our indexed iTru5 and iTru7 primers were biasing amplification, we  
298 selected a subset of iTru7 (n=160) and iTru5 (n=48) primers for qPCR validation. To validate the  
299 iTru primers, we prepared a pool of adapter-ligated chicken DNA using an inexpensive, double-  
300 digest RAD approach (3RAD; Graham et al., 2015, Bayona-Vásquez et al., 2019) that produces a  
301 DNA construct having 5' and 3' ends identical to our Y-yoke adapter. We then set up  
302 quantitative PCR reactions with 5  $\mu$ L GoTaq qPCR Master Mix (Promega, Madison, WI, USA),  
303 1  $\mu$ L each forward and reverse primer at 5  $\mu$ M, 2  $\mu$ L adapter-ligated DNA at 0.12 ng/ $\mu$ L, and 1  
304  $\mu$ L H<sub>2</sub>O. Working under the assumption that Illumina primers have been validated as unbiased  
305 by Illumina, we tested all forward (iTru5) primers with Illumina D701 as the reverse primer, and  
306 we tested all reverse (iTru7) primers with Illumina D501 as the forward primer. We ran all  
307 primer tests in duplicate on an Applied Biosystems StepOnePlus (Thermo Fisher Scientific,  
308 Waltham, MA, USA) using the following conditions: 95°C for 2 min, then 40 cycles of 95°C for  
309 15 s, and 60°C for 1 min. Because we needed to run multiple plates of qPCR to test all of the  
310 primers, we included the iTru5 set 2 primer A (iTru5\_02\_A) and the iTru7 set 2 primer 1  
311 (iTru7\_02\_01) on all plates to provide a baseline reference for iTru5 or iTru7 primer  
312 performance. We determined the threshold cycle ( $C_T$ ) using the default settings of the  
313 StepOnePlus, we averaged  $C_T$  values from replicate runs, and we calculated Delta  $C_T$  for each  
314 iTru primer using two approaches. First, we evaluated the relative performance of all iTru5 and  
315 iTru7 primers by subtracting the  $C_T$  of the iTru5 or iTru7 primer being tested from the average  
316  $C_T$  of all iTru5 or iTru7 primers. Second, we evaluated the performance of all iTru5 and iTru7  
317 primers by subtracting the baseline reference  $C_T$  of iTru5\_02\_A from the  $C_T$  of the iTru5 primer  
318 being tested and by subtracting the baseline reference  $C_T$  of iTru7\_02\_01 from the  $C_T$  of the



319 iTru7 primer being tested. We expected that unbiased primers would not deviate from the  
320 average and/or baseline performance by more than 1.5 PCR cycles ( $>1.5 C_T$ ), a value that should  
321 encompass the stochasticity seen between independent PCR reactions as a result of small,  
322 unavoidable primer concentration and other amplification performance differences.

323

#### 324 ***Implementation in E. coli and eukaryote libraries: DNA source***

325 To test the performance of both our Y-yoke adapters and the iTru system in a variety of library  
326 preparation scenarios, we prepared genomic libraries from DNA of various types and quality. As  
327 a simple, known source of control DNA, we used *Escherichia coli* k-12 strain MG1655  
328 (hereafter *E. coli*; Roche, Basel, Switzerland), which has a high-quality genome sequence  
329 available (GenBank accession NC\_000913; 4.6 Mb) and is commonly used for quality control of  
330 sequencing libraries. To examine how our iTru system performed with DNA of varying quality  
331 and complexity, we also prepared iTru libraries from DNA that we isolated from six samples  
332 from a diverse array of species (two sharks, one tarantula, one jellyfish, and a coral). We isolated  
333 each of these DNA sources using a variety of techniques commonly used in many labs, including  
334 commercial kits, salting out, or CTAB Phenol-Chloroform extraction (Table 4; also see File S1  
335 for additional details about testing iNext). These samples represent the range of species,  
336 sampling conditions, and DNA isolation techniques that are commonly encountered in model  
337 and non-model organism studies, and the taxa we sampled included particularly challenging  
338 specimens (i.e., tarantula, coral and jellyfish) that have previously performed poorly with  
339 commercial library preparation kits. Before library preparation, we fragmented *E. coli* genomic  
340 DNA to 400-600 bp using a Covaris S2 (Covaris, Woburn, MA, USA), and we fragmented  
341 genomic DNA (normalized to 23 ng/ $\mu$ L) to 400-600 using the Bioruptor UCD-300 sonication  
342 device (Diagenode, Denville, NJ, USA).

343

#### 344 ***Implementation in E. coli and eukaryote libraries: library construction***

345 Prior to library preparation, we annealed the iTru adapter sequences to form double-stranded, Y-  
346 yoke adapters by mixing equal volumes of the iTru\_R1\_stub and iTru\_R2\_stub\_RCp oligos at  
347 100  $\mu$ M, supplementing the mixture with 100 mM NaCl, heating the solution to 98°C for 2 min  
348 in a thermal cycler, and allowing the thermal cycler to slowly cool the mixture to room  
349 temperature (File S7).

350 We prepared genomic iTru libraries from *E. coli* using kits, reagents, and protocols from  
351 Kapa Biosystems (Roche, Basel, Switzerland), with minor modifications to the manufacturer's  
352 instructions. The major change we made was to ligate the universal iTru adapter stubs (Table 3;  
353 File S4) to the 3'-adenylated (i.e., +A) DNA fragments, and then use the iTru5 and iTru7 primers  
354 with TruSeqHT indexes for limited-cycle amplification (Figs. 1-3). For the eukaryotic libraries,  
355 we further modified the manufacturer's instructions by using half-volume reaction sizes with the  
356 following two changes. We used an inexpensive alternative to commercial SPRI reagents (Sera-  
357 Mag SpeedBeads, Thermo-Scientific, Waltham, MA, USA; see File S8) in all cleanup steps.  
358 After adapter ligation, we performed a post-ligation cleanup followed by SPRI dual-size

359 selection using first 0.55x PEG/NaCl and then an additional 0.16x SpeedBeads which also  
360 contains PEG/NaCl. We outline step-by-step methods for this approach in File S9.

361

### 362 **Sequencing**

363 We quantified libraries using a Qubit 2.0 Fluorometer (Thermo Fisher Scientific, Waltham, MA,  
364 USA) and KAPA qPCR, checked for index diversity (File S10), and then normalized and pooled  
365 all libraries at 10 nM (File S11). We also ensured the quality of library pools by running 1  $\mu$ L on  
366 a Bioanalyzer High Sensitivity chip (Agilent Technologies, Santa Clara, CA, USA). We  
367 combined the iTru and iNext *E. coli* library pools (File S1) with samples from other experiments,  
368 and we sequenced the combined pools using a single run in Illumina MiSeq v2 500 cycle kit  
369 (PE250). We combined the eukaryotic libraries with additional TruSeq libraries from other  
370 experiments and sequenced these on a separate run of Illumina MiSeq v2 500 cycle kit to  
371 produce PE250 reads.

372

### 373 **Sequence analysis**

374 After sequencing, we demultiplexed reads using Illumina software (bcl2fastq v 1.8 – 2.17;  
375 Illumina 2013). We then imported reads to Geneious 6.1.7 – R9.0.4 and trimmed adapters and  
376 low-quality bases ( $<Q20$ ). We removed reads with inserts of  $<125$  bases prior to all downstream  
377 analyses. We mapped *E. coli* reads back to NC\_000913 using the Geneious mapper (fastest  
378 setting, single iteration). We assembled reads from the eukaryotic libraries using the Geneious  
379 assembler (fastest setting), and we extracted contigs of 250 to 450 bp from eukaryotic libraries of  
380 tarantula, jellyfish, and coral for downstream microsatellite searches using msatCommander  
381 1.0.8 (Faircloth, 2008). We also used PAL\_FINDER v0.02.03 (Castoe et al., 2012) to enumerate  
382 microsatellites within read-pairs that had inserts  $\geq 250$  bases. Finally, we extracted contigs of  
383 approximately 17 kb from the shark libraries, and we used MEGA-BLAST searches to determine  
384 which of these contigs represented shark mtDNA genomes (Díaz-Jaimes et al., 2016). We did the  
385 same with approximately 18 kb fragments from the coral (Del Rio-Portilla et al., 2016).

386

### 387 **Larger-scale tests**

388 Following initial validation of the iTru primers and the utility of the iTru library preparation  
389 approach, we placed the iTru system into an extensive test phase in which we routinely used this  
390 approach for library construction within our own labs while we also made all components of the  
391 iTru system available to dozens of other labs. To demonstrate the utility of our approach across a  
392 variety of projects, we analyzed read count data from four of these studies ( $n=576$  libraries) that  
393 used the iTru system as part of a workflow for target enrichment of ultraconserved elements  
394 (UCEs; Faircloth et al., 2012). These included 90 iTru libraries prepared by our group from  
395 cichlid fishes (McGee et al., 2016), 183 iTru libraries prepared by a second group from  
396 carangimorph fishes (Harrington et al., 2016), 100 iTru libraries prepared by a third group from  
397 ants (Faircloth et al. 2015; Blaimer et al., 2016), and 203 iTru libraries prepared by our group  
398 from birds. For the bird libraries, we prepared one batch of standard Illumina libraries ( $n=10$ )

399 and 2 batches of iTru libraries (n=203), which allowed us to look at sample-to-sample  
400 differences in read counts returned from standard Illumina libraries relative to our iTru libraries.  
401 One of the two batches of iTru libraries (n=92) combined standard Illumina primers (D5xx;  
402 which we used on *E. coli*) on the P5 side with iTru7 primers on the P7 side. The second batch  
403 (n=111) combined iTru5 primers on the P5 side with iTru7 primers on the P7 side. The first  
404 batch allowed us to assess iTru7 performance separate from that of iTru5, while the iTru5+iTru7  
405 libraries allowed us to assess performance of the full iTru system relative to all other  
406 combinations. For all remaining libraries within the other projects, each group followed the  
407 protocols for iTru library preparation described above using combinations of only iTru5 and  
408 iTru7 primers.

409 Following library preparation and PCR amplification, each laboratory combined all  
410 libraries into equimolar pools containing 8-12 libraries and followed a standardized protocol for  
411 target enrichment of UCE loci (<http://ultraconserved.org>; Faircloth et al. 2012). After  
412 enrichment, each group used a Bioanalyzer to determine the insert size of enriched libraries and,  
413 to reduce the variance in number of reads sequenced from each pool, quantified pools using a  
414 commercially available KAPA qPCR kit. Prior to sequencing, all research groups used the  
415 average fragment size distribution and qPCR concentration of each pool to produce an  
416 equimolar, project-specific pool-of-pooled-libraries for sequencing with a final concentration of  
417 10 nM. We sequenced the enriched cichlid and carangimorph libraries using different, partial  
418 runs of PE150 sequencing on an Illumina NextSeq, the ant libraries using one lane of PE125  
419 sequencing on an Illumina HiSeq 2500, and the bird libraries using two lanes of PE150  
420 sequencing on an Illumina HiSeq 1500 (Rapid Run Mode). For the carangimorph fish libraries,  
421 we wanted each sample to receive 0.5% of the total number of reads in the NextSeq run. For all  
422 other libraries, we wanted each library to receive 1% of the total number of reads. After  
423 sequencing, we computed the average number of raw reads returned per sample, the 95%  
424 confidence interval (95 CI) of reads returned per sample, and the percentage of reads returned  
425 per sample.

426

## 427 **Results**

### 428 ***Validation of iTru primers by quantitative PCR (qPCR)***

429 Almost all iTru primers (158/160 iTru7 and 48/48 iTru5) had average  $C_T$  values within 1.5  
430 cycles of both the average  $\Delta C_T$  and the baseline  $\Delta C_T$  (Fig. S8; File S12), suggesting that our  
431 iTru indexed amplification primers amplify successfully (98.7% success for iTru7; 100% success  
432 for iTru5) and perform similarly to one another. There were two iTru7 primers that failed to  
433 amplify during their initial tests, iTru7\_401\_07 and iTru7\_209\_04. We rehydrated a new plate of  
434 primers and retested iTru7\_401\_07, which amplified normally ( $C_T = 19.4$ ,  $\Delta C_T$  (average) = -0.7;  
435  $\Delta C_T$  (baseline) = 1.1) during the retest.

436

### 437 ***E. coli iTru libraries***

438 The iTru libraries we prepared from *E. coli* returned similar numbers of reads from each iTru  
439 library, averaging 973,008 reads per sample (95 CI: 161,044; Fig S9; File S13). Each library  
440 contained >400,000 high quality reads that covered >99.99% of the known *E. coli* genome  
441 sequence. These results suggest that our genomic iTru library preparation process produces valid  
442 constructs for Illumina sequencing, and that iTru dual-indexed libraries pooled at equimolar  
443 ratios return roughly similar amounts of sequence data (Fig. S9), although we combined libraries  
444 at equimolar ratios prior to sequencing using fluorometry which can result in some variation  
445 around the targeted read number for each library.

446

#### 447 ***Eukaryote iTru libraries***

448 We successfully sequenced all eukaryotic genomic libraries prepared using the iTru system and  
449 the libraries returned an average of 1,806,440 reads per sample (95 CI: 743,337; Table 4). Using  
450 a genome skimming approach, we sequenced the mitogenomes of the shark and coral samples to  
451 an average coverage of 33x and 50x, respectively. We used the contig assemblies from our  
452 tarantula, jellyfish, and coral samples to design primers pairs targeting >100 microsatellite loci in  
453 each taxon. Although the variance in the number of sequencing reads returned per library was  
454 higher among these samples than the *E. coli* libraries, these results demonstrate that the iTru  
455 system can be used to prepare libraries from DNA of different organisms extracted using  
456 different purification approaches, including DNA that produced very poor results with  
457 commercial kits (data not shown).

458

#### 459 ***Larger-scale tests***

460 Our beta test allowed us to collect sequence data from many different iTru5 and iTru7 primers  
461 used to index a variety of iTru libraries from fishes, ants, and birds. Few of the libraries that we  
462 or others prepared using the iTru system showed large differences in the desired number of reads  
463 sequenced when compared to libraries having Illumina-only adapters/index sequences when  
464 viewed in aggregate (Fig. S10) or on an index-by-index basis across projects (Figs. S11-S14; File  
465 S14). The iTru primer combinations that sometimes returned a lower number of reads for a  
466 particular library in a particular project did not show this behavior in other studies (e.g., compare  
467 iTru7\_402\_07 in Fig. S13 versus Fig. S14), suggesting that the reduction in read numbers results  
468 from particular library preparation, pooling, enrichment, and quantification practices for specific  
469 samples (i.e., specific experimental errors, library preparation methods, or sample-index  
470 interactions) rather than inherently bad iTru indexes/primers.

471

#### 472 **Discussion**

473 Our results show that the iTru universal adapter stubs and iTru primers can be used to produce  
474 genomic libraries for a variety of purposes. The low variance in  $C_T$  values among iTru5 and  
475 iTru7 primers demonstrates that the different index sequences have minimal effect on the  
476 libraries, and our results from real-world tests demonstrate that the iTru system works well with  
477 DNA from different extraction methods and of differing quality, quantity, and copy number. The

478 results we present from DNA libraries prepared using the iTru system in our and others'  
479 laboratories show that the approach easily scales to hundreds of libraries prepared, pooled, and  
480 sequenced in a single lane, ultimately producing information consistent with the variety of  
481 Illumina library techniques we have employed to obtain similar data (e.g., Crawford et al., 2012;  
482 McCormack et al., 2013; Smith et al., 2014).

483 After testing the iTru system in several labs, we made several changes in our approach.  
484 The most significant of these were: 1) use a naming scheme that allows researchers to easily  
485 identify sets of iTru7 primers that are compatible or incompatible with TruSeq indexes; and 2) to  
486 increase the amount of iTru5 and iTru7 aliquoted into plates after oligo synthesis (from 0.625  
487 nmol to 1.25 nmol), which reduced library amplification failures that resulted from improper  
488 hydration of low-quantity primers in specific wells of plates. The naming scheme and  
489 concentrations used in all supplemental files and the naming scheme we used in the Methods  
490 section reflect these changes to minimize confusion. After making these changes, we and others  
491 have successfully produced libraries and sequencing reads from all iTru5 and iTru7 primers,  
492 libraries for many of the primers are detailed in the supplemental files, and we have no evidence  
493 suggesting that any of the primer sequences will not work correctly. The original sets of iTru7  
494 primers (sets 00 – 13) synthesized for beta testing have mixed compatibility with Illumina  
495 indexes, thus we encourage beta users to exhaust old stocks and adopt the new sets.

496 It is important to note that the iTru5 and iTru7 primers are grouped into “balanced” sets  
497 of 8 or 12 to minimize problems of index base diversity during sequencing. Index balance  
498 problems arise because of the way Illumina platforms detect bases during the sequencing run  
499 (Illumina, 2016), and the main issues associated with unbalanced base composition are  
500 experienced when relatively few samples are sequenced or when a small number of libraries with  
501 unbalanced sequence tags take up a large fraction of the sequencing run. We modeled the  
502 original four color-scheme used in HiSeq and MiSeq instruments. Using an entire group of eight  
503 iTru5 and 12 iTru7 indexed primers within a sequencing pool where each library is present in  
504 equal proportion ensures balanced base representation during the index sequence read(s). We  
505 also empirically validated this in the two-channel system used in NextSeq, MiniSeq and  
506 NovaSeq platforms. Generally, when researchers multiplex more than one group of eight iTru5  
507 or 12 iTru7 indexed primers, base diversity is even more balanced, although it is always a good  
508 idea to check the balance of sequencing tags in all sequencing runs (i.e., use File S10). When less  
509 than a whole set of primers (i.e., <8 iTru5 primers or <12 iTru7 primers) are used, or if very few  
510 libraries will dominate the percentage of reads within a run, it becomes critical to ensure the tags  
511 are sufficiently diverse (i.e., use File S10, which includes separate calculations of base diversity  
512 for both color schemes). It is also possible to use the stub ligation products from one sample for  
513 multiple PCR reactions with different iTru5, iTru7 primers, or even to pool iTru5 and iTru7  
514 primers, thus creating increased numbers of indexes in a pool from a limited number of samples.

515 All of the iTru oligonucleotides make use of a single phosphorothioate bond between the  
516 penultimate and 3' base. Phosphorothioate linkages protect the 3' end of oligonucleotides from  
517 some forms of nuclease activity (Ekstein, 1985; Skerra, 1992) such as those introduced by some

518 DNA ligases and polymerases (exonuclease activity is a common contaminant of ligases and an  
519 intrinsic activity of proofreading polymerases), but phosphorothioate linkages add a modest cost  
520 to each primer (~\$3 USD per phosphorothioate linkage). Phosphorothioate linkages are also  
521 chiral, so only 50% of synthetic molecules receive protection per linkage, while the other 50%  
522 remain susceptible to nuclease activity (Eckstein, 1985). Adding a second phosphorothioate bond  
523 can reduce the proportion of unprotected molecules by 50% (thus 75% would be protected and  
524 25% would remain susceptible). Illumina and other vendors often include three or more  
525 phosphorothioate linkages at the 3' end of their oligonucleotides to ensure that a large fraction of  
526 the molecules are protected from nuclease activity. We include only a single phosphorothioate  
527 linkage in our iTru oligo designs because if we lose the 3' base, we would rather lose the rest of  
528 the molecule instead of rescuing the remaining part of it, which may not function appropriately.  
529 This strategy also reduces costs associated with synthesizing the oligonucleotides, although  
530 others may prefer to incorporate additional phosphorothioate linkages (e.g., two phosphorothioate  
531 linkages would lead to 50% fully protected oligonucleotides and 25% that only lose a single 3'  
532 base).

533

#### 534 ***Who should adopt this method?***

535 Today, there is great need to efficiently minimize cost per sample by scaling and increasing  
536 multiplexing flexibility, especially with the advent of platforms like the NovaSeq 6000 that can  
537 yield up to 3000 Gb in a single run. Researchers who need higher capacity to multiplex their  
538 Illumina library preparations or who have not yet invested heavily in any other method will  
539 likely find our approach attractive. It has a low cost of entry and significant flexibility (see  
540 below). The more types of libraries, projects, and samples researchers use, the quicker they will  
541 recoup the cost of switching and see savings. Additionally, researchers using MK-2010 to  
542 construct libraries with inserts >200 bp, particularly those inserts  $\geq 500$  bp, are likely to benefit  
543 from using a Y-yoke adapter. Our dual-indexed iTru/iNext libraries also reduce concerns over  
544 misassignment because, although index-switching occurs with low probability at both ends of  
545 sequences in a library, it rarely affects both ends of the same fragment (Larsson et al., 2018).

546 Researchers already invested in and using other methods with good success, such as the  
547 MK-2010 or F-2011 approaches, may wonder if it is worthwhile to switch. We suggest that it  
548 would be reasonable to continue using the MK-2010 and/or F-2011 methods if these are already  
549 being used successfully; for these labs, we simply provide some alternative adapters and primers  
550 that could be used once existing stocks of MK-2010 and/or F-2011 adapters and primers are  
551 exhausted or when new projects requiring unique or larger numbers of uniquely tagged samples  
552 are encountered.

553

#### 554 ***iNext***

555 In addition to the iTru adapters and primers we designed and tested, we have developed a  
556 universal adapter stub and sets of primers (iNext; Supplementary File 1) that are compatible with  
557 the Illumina Nextera system and the original 8 x 12 Nextera indexes, though they are not

558 compatible with all of the subsequent Nextera indexes. As noted in the methods, both iNext and  
559 iTru make use of slightly different subsets of the tags identified by Faircloth & Glenn (2012),  
560 and the indexed primer sets and numbering approaches are independent between iNext and iTru  
561 (e.g., iNext5\_01\_A does not have the same sequence tag as iTru5\_01\_A). Thus, researchers  
562 should use the tag sequence or tag number from Faircloth & Glenn (2012) or the tag sequences  
563 themselves to determine which indexes are equivalent (e.g., iNext7\_07\_06 uses tag 113  
564 [AGCTAAGC] as does iTru7\_203\_10; these should not be combined into a single sequencing  
565 pool). Although we demonstrate it is possible to combine iNext and iTru libraries within the  
566 same MiSeq run (File S13; the iNext and iTru *E. coli* data come from a single MiSeq run) and  
567 have subsequently added iNext or Nextera libraries in limited quantities to several of our iTru  
568 library pools run on the MiSeq, we are skeptical that other researchers should or will do this  
569 routinely. If researchers want to combine iNext and iTru libraries on a regular basis, it would be  
570 worthwhile to run additional experiments and to screen and sort the tags to compile sets with  
571 numbering that is consistent, thus facilitating pooling between the two systems.

572

### 573 ***Troubleshooting***

574 Although all researchers endeavor to conduct mistake-free experiments, foul-ups are certain to  
575 occur. In addition to simple record-keeping errors, a very common mistake is flipping the  
576 orientation of one of the strip tubes containing iTru primer aliquots. Thus, it is critical to have the  
577 capacity to quickly and easily determine what index sequences and combinations are present  
578 within a sequencing run. We have developed a small and fast python program (Supplementary  
579 File S15) that can count the indexes within a file of reads that were not assigned to specific  
580 samples during demultiplexing (i.e., the undetermined reads from bcl2fastq).

581

### 582 ***Other applications and future modifications***

583 It is possible to use the iTru system for a variety purposes beyond what we describe here. For  
584 example, we have used the iTru system for making RNAseq libraries using KAPA library kits, as  
585 well as NEB Ultra II and Ultra II FS (New England Biolabs, Ipswich, MA, USA). Nearly any  
586 approach that yields double-stranded template molecules with a single adenosine can be used  
587 with no significant modifications to what we have described. One of the attractive features of our  
588 system is that it separates the primers and stubs into more manageable units. In other  
589 *Adapterama* papers, we use these same iTru primers with different adapter stubs to construct  
590 double- to quadruple-indexed amplicon libraries (Glenn et al., 2019), double-digest restriction-  
591 site associated DNA (3RAD; Bayona-Vásquez et al., 2019), and RADcap (Hoffberg et al., 2016)  
592 libraries. All of these extensions facilitate library preparation, sequencing, and bioinformatic  
593 processing of these types of data while also significantly reducing costs.

594 Having separate primers and adapter stubs simplifies and reduces costs associated with  
595 modification or swapping out of the universal Y-yoke adapters (Table 3; Files S4; S16), creating  
596 opportunities for further research and protocol development. For example, if researchers wanted  
597 to optimize library preparation for low levels of input DNA, then implementing an adapter stub

598 in a stem-loop configuration [*e.g.*, NEB Next Ultra; (New England Biolabs, Ipswich, MA, USA)]  
599 would be worth investigating. Similarly, adapters containing uracils that are broken at the uracil  
600 sites by USER (NEB M5505) or uracil-DNA-glycosylase (UDG; *e.g.*, NEB M0280) plus APE 1  
601 (*e.g.*, NEB M0282) facilitate a variety of designs with potentially beneficial characteristics worth  
602 exploring, especially for mate-pair libraries. However, given recent advances in commercial kits  
603 that reduce buffer exchanges and increase efficiency (*e.g.*, KAPA Hyper and HyperPlus and  
604 NEB Ultra II and UltraII FS, which require as little as 1 ng of input DNA), it is likely that the use  
605 of such high efficiency approaches combined with the iTru adapters and primers will be  
606 sufficient for the vast majority of applications where samples derive from  $\geq 1000$  eukaryotic  
607 cells.

608

## 609 **Conclusions**

610 We describe an approach that uses a single universal adapter stub and relatively few PCR  
611 primers to produce many Illumina libraries. The approach allows multiple researchers to have  
612 unique primer sets so that libraries from individual researchers can be pooled without worrying  
613 about tag overlap. These primers can also be used with a variety of other application-specific  
614 adapters described in subsequent *Adapterama* papers for amplicon and RADseq libraries  
615 (Bayona-Vásquez et al., 2019; Glenn et al., 2019; Hoffberg et al., 2016). By modularizing library  
616 construction, researchers are free to focus on the development of new application-specific tags.  
617 Taking advantage of the many available tags also creates opportunities for low-cost experimental  
618 optimization attempts. Although the adapters and primers we describe are specific to Illumina,  
619 many of the ideas can easily be extended to Ion Torrent, Pacific Biosystems, Oxford Nanopore,  
620 and other sequencing platforms (Glenn et al., 2007).

621

## 622 **Acknowledgements**

623 Oligonucleotide sequences © 2007-2019 Illumina, Inc. All rights reserved. Derivative works  
624 created by Illumina customers are authorized for use with Illumina instruments and products  
625 only. All other uses are strictly prohibited. We thank Rigoberto Delgado Vega, Yann Henaut,  
626 Salima Machkour M'Rabet, Fausto Valenzuela, Eduardo Balart, David Paz, Carolina Galvan,  
627 Liza Gomez Daglio, and Pindaro Díaz Jaimes for providing samples, Erin Lipp for generously  
628 sharing laboratory space and equipment, Rahat Desai, Megan Beaudry, Julia Frederick and Will  
629 Thompson for helpful edits, and our colleagues at the Georgia Genomics and Bioinformatics  
630 Core and the Georgia Advanced Computing Resource Center. We thank Richard Harrington,  
631 Matt Friedman, and Thomas Near (carangimorph fishes), and Michael Branstetter, John  
632 Longino, and Phil Ward (ants) for allowing us to use read-count information from their  
633 respective studies. Finally, we acknowledge and thank Lisa Ortuno (deceased) for her  
634 enthusiastic support of this work; our world was enriched while she shared it with us.

635

## 636 **References**



- 637 Adey A, Morrison HG et al. (2010) Rapid, low-input, low-bias construction of shotgun fragment  
638 libraries by high-density *in vitro* transposition. *Genome Biology*, **11**, R119. doi:  
639 10.1186/gb-2010-11-12-r119
- 640 Aird D, Ross MG, Chen WS et al. (2011) Analyzing and minimizing PCR amplification bias in  
641 Illumina sequencing libraries. *Genome Biology*, **12**, R18. doi: 10.1186/gb-2011-12-2-r18
- 642 Aljanabi SM, Martínez I (1997) Universal and rapid salt-extraction of high quality genomic  
643 DNA for PCR-based techniques. *Nucleic Acids Research*, **25**:4692-4693. doi:  
644 10.1093/nar/25.22.4692
- 645 Ansorge WJ (2009) Next-generation DNA sequencing techniques. *Nature Biotechnology*, **25**,  
646 195-203. doi: 10.1016/j.nbt.2008.12.009
- 647 Bayona-Vásquez NJ, Glenn TC, Pierson TW, Kieran TJ, et al. (2019) Adapterama III: Bringing  
648 our adapters and primers to implement an economic and efficient quadruple-indexed  
649 double/triple-enzyme RADseq libraries (2RAD/3RAD). Submitting update to PeerJ,  
650 previous version (2018) available at BioRxiv doi: 10.1101/205799
- 651 Bentley DR, Balasubramanian S, Swerdlow HP et al. (2008) Accurate whole human genome  
652 sequencing using reversible terminator chemistry. *Nature*, **456**, 53-59. doi:  
653 10.1038/nature07517
- 654 Binladen J, Gilbert MTP, Bollback JP et al. (2007) The use of coded PCR primers enables high-  
655 throughput sequencing of multiple homolog amplification products by 454 parallel  
656 sequencing. *PLoS ONE*, **2**, e197. doi: 10.1371/journal.pone.0000197
- 657 Blaimer BB, LaPolla JS, Branstetter MG, Lloyd MW, Brady SG (2016) Phylogenomics,  
658 biogeography and diversification of obligate mealybug-tending ants in the genus  
659 *Acropyga*. *Molecular Phylogenetics and Evolution*, **102**, 20-29. doi:  
660 10.1016/j.ympev.2016.05.030
- 661 Castoe TA, Poole AW, de Koning APJ et al. (2012) Rapid microsatellite identification from  
662 Illumina paired-end genomic sequencing in two birds and a snake. *PLoS ONE*, **7**, e30953.  
663 doi: 10.1371/journal.pone.0030953
- 664 Costello M, Fleharty M, Abreu J, et al. (2018) Characterization and remediation of sample index  
665 swaps by non-redundant dual indexing on massively parallel sequencing platforms. *BMC*  
666 *Genomics*, **19**, 332. doi: 10.1186/s12864-018-4703-0
- 667 Craig DW, Pearson JV, Szelinger S et al. (2008) Identification of genetic variants using bar-  
668 coded multiplex sequencing. *Nature Methods*, **5**, 887-893. doi: 10.1038/nmeth.1251
- 669 Crawford NG, Faircloth BC, McCormack JE *et al.* (2012) More than 1000 ultraconserved  
670 elements provide evidence that turtles are the sister group of archosaurs. *Biology Letters*,  
671 **8**, 783-6. doi: 10.1098/rsbl.2012.0331
- 672 Del Rio Portilla MA, Vargas Peralta CE, Paz García DA, Lafarga De La Cruz F, E. Balart Páez  
673 E, García De León FJ (2016) The complete mitochondrial DNA of endemic Eastern  
674 Pacific coral (*Porites panamensis*). *Mitochondrial DNA*, **27**, 738-739. doi:  
675 10.3109/19401736.2014.913166

- 676 Díaz-Jaimes P, Hinojosa-Alvarez S, Sánchez-Hernández X, Hoyos-Padilla M, García-De-León  
677 FJ (2016) The complete mitochondrial DNA of white shark (*Carcharodon carcharias*)  
678 from Isla Guadalupe, Mexico. *Mitochondrial DNA*, **27**, 1281-1282. doi:  
679 10.3109/19401736.2014.945556
- 680 Eckstein F (1985) Nucleoside phosphorothioates. *Ann. Rev. Biochem.*, **54**, 367-402. doi:  
681 10.1146/annurev.bi.54.070185.002055
- 682 Faircloth BC (2008) MSATCOMMANDER: detection of microsatellite repeat arrays and  
683 automated, locus-specific primer design. *Molecular Ecology Resources*, **8**, 92-94. doi:  
684 10.1111/j.1471-8286.2007.01884.x.
- 685 Faircloth BC, Glenn TC (2012) Not all sequence tags are created equal: Designing and validating  
686 sequence identification tags robust to indels. *PLoS ONE*, **7**, e42543. doi:  
687 10.1371/journal.pone.0042543
- 688 Faircloth BC, McCormack JE, Crawford NG, et al. (2012) Ultraconserved elements anchor  
689 thousands of genetic markers for target enrichment spanning multiple evolutionary  
690 timescales. *Systematic Biology*, **61**, 717-26. doi: 10.1093/sysbio/sys004
- 691 Faircloth BC, Branstetter MG, White ND, Brady SG (2015) Target enrichment of ultraconserved  
692 elements from arthropods provides a genomic perspective on relationships among  
693 Hymenoptera. *Mol. Ecol. Resour.*, **15**(3): 489-501. doi: 10.1111/1755-0998.12328
- 694 Fisher S, Barry A, Abreu J, Minie B, Nolan J, et al. (2011) A scalable, fully automated process  
695 for construction of sequence-ready human exome targeted capture libraries. *Genome*  
696 *Biology* 12:R1. doi: 10.1186/gb-2011-12-1-r1
- 697 Galván-Tirado C, Hinojosa-Alvarez S, Diaz-Jaimes P, Marcet-Houben M, García-De-León FJ  
698 (2016) The complete mitochondrial DNA of the silky shark (*Carcharhinus falciformis*).  
699 *Mitochondrial DNA*, **27**, 157-158. doi: 10.3109/19401736.2013.878922
- 700 Glenn TC (2011) Field guide to next-generation DNA sequencers. *Molecular Ecology*  
701 *Resources*, **11**, 759-769. doi: 10.1111/j.1755-0998.2011.03024.x.
- 702 Glenn TC (2016) Update to the field guide to next-generation DNA sequencers.  
703 <http://www.molecularecologist.com/next-gen-fieldguide-2016/> accessed 04/15/2016.
- 704 Glenn TC, Jones KL, Lance SL, et al. (2007) Source tagging and normalization of DNA for  
705 parallel DNA sequencing. U.S. Provisional Patent 60/909,010 filed March 30, 2007.
- 706 Glenn TC, Pierson TW, Kieran TJ, et al. (2019) Adapterama II: Universal amplicon sequencing  
707 in Illumina platforms (TaggiMatrix). Submitting to PeerJ and available in BioRxiv doi:  
708 10.1101/xxxxxx
- 709 Graham CF, Glenn TC, McArthur A, et al. (2015) Impacts of degraded DNA on Restriction  
710 enzyme Associated DNA Sequencing (RADSeq). *Molecular Ecology Resources*, **15**,  
711 1304-1315. doi: 10.1111/1755-0998.12404
- 712 Greigite (2009) Adapter illustration PDF. Available at:  
713 <http://seqanswers.com/forums/showpost.php?p=7629&postcount=36> accessed 02/25/  
714 2019.

- 715 Harrington RC, Faircloth BC, Eytan RI, et al. (2016) Phylogenomic analysis of carangimorph  
716 fishes reveals flatfish asymmetry arose in a blink of the evolutionary eye. *BMC*  
717 *Evolutionary Biology*, **16**:224. doi: 10.1186/s12862-016-0786-x
- 718 Head SR, Komori HK, LaMere SA, et al. (2014) Library construction for next-generation  
719 sequencing: Overviews and challenges. *BioTechniques*, **56**, 61-77. doi:  
720 10.2144/000114133
- 721 Hoffberg SL, Kieran TJ, Catchen JM, et al. (2016) RADcap: Sequence capture of dual-digest  
722 RADseq libraries with identifiable duplicates and reduced missing data. *Molecular*  
723 *Ecology Resources*, **16**(5): 1264-1278. doi: 10.1111/1755-0998.12566
- 724 Hoffmann C, Minkah N, Leipzig J et al. (2007) DNA bar coding and pyrosequencing to identify  
725 rare HIV drug resistance mutations. *Nucleic Acids Research*, **13**, e91. doi:  
726 10.1093/nar/gkm435
- 727 IDT (2018) Adapters for Next Generation Sequencing. [http://idtdna.com/pages/products/next-](http://idtdna.com/pages/products/next-generation-sequencing/adapters)  
728 [generation-sequencing/adapters](http://idtdna.com/pages/products/next-generation-sequencing/adapters) accessed 2 August 2018.
- 729 Illumina (2008) Multiplexed sequencing with the Illumina Genome Analyzer system. Pub. No.  
730 770-2008-011. Available at:  
731 [http://www.illumina.com/documents/products/datasheets/datasheet\\_sequencing\\_multiple](http://www.illumina.com/documents/products/datasheets/datasheet_sequencing_multiple_x.pdf)  
732 [x.pdf](http://www.illumina.com/documents/products/datasheets/datasheet_sequencing_multiple_x.pdf), accessed 28 April 2016.
- 733 Illumina (2012) Frequently asked questions; Sequencing; Can I run TruSeq HT libraries with  
734 Nextera libraries on the same lane or flow cell? Available at:  
735 [http://support.illumina.com/sequencing/sequencing\\_kits/truseq\\_dna\\_ht\\_sample\\_prep\\_kit/](http://support.illumina.com/sequencing/sequencing_kits/truseq_dna_ht_sample_prep_kit/questions.ilmn)  
736 [questions.ilmn](http://support.illumina.com/sequencing/sequencing_kits/truseq_dna_ht_sample_prep_kit/questions.ilmn), accessed 28 April 2016.
- 737 Illumina (2016) Nextera low plex pooling guidelines. Technical note: DNA Analysis. Pub. No.  
738 770-2011-044, current as of 24 March 2016. Available at:  
739 [http://www.illumina.com/documents/products/technotes/technote\\_nextera\\_low\\_plex\\_poo](http://www.illumina.com/documents/products/technotes/technote_nextera_low_plex_pooling_guidelines.pdf)  
740 [ling\\_guidelines.pdf](http://www.illumina.com/documents/products/technotes/technote_nextera_low_plex_pooling_guidelines.pdf), accessed 28 April 2016.
- 741 Illumina (2017) bcl2fastq2 conversion software v.2.19 user guide. Illumina Proprietary Part  
742 #15051736v2, March 2017. [https://support.illumina.com/content/dam/illumina-](https://support.illumina.com/content/dam/illumina-support/documents/documentation/software_documentation/bcl2fastq/bcl2fastq2_guide_15051736_v2.pdf)  
743 [support/documents/documentation/software\\_documentation/bcl2fastq/bcl2fastq2\\_guide](https://support.illumina.com/content/dam/illumina-support/documents/documentation/software_documentation/bcl2fastq/bcl2fastq2_guide_15051736_v2.pdf)  
744 [15051736\\_v2.pdf](https://support.illumina.com/content/dam/illumina-support/documents/documentation/software_documentation/bcl2fastq/bcl2fastq2_guide_15051736_v2.pdf) accessed 1<sup>st</sup> August 2018.
- 745 Illumina (2018a) Indexed sequencing overview guide. Illumina Proprietary Document  
746 #15057455v04, February 2018. [http://support.illumina.com/content/dam/illumina-](http://support.illumina.com/content/dam/illumina-support/documents/documentation/system_documentation/miseq/indexed-sequencing-overview-guide-15057455-04.pdf)  
747 [support/documents/documentation/system\\_documentation/miseq/indexed-sequencing-](http://support.illumina.com/content/dam/illumina-support/documents/documentation/system_documentation/miseq/indexed-sequencing-overview-guide-15057455-04.pdf)  
748 [overview-guide-15057455-04.pdf](http://support.illumina.com/content/dam/illumina-support/documents/documentation/system_documentation/miseq/indexed-sequencing-overview-guide-15057455-04.pdf), accessed 2 August 2018.
- 749 Illumina, 2018b. Nextera XT DNA Library Prep Kit Reference Guide. Illumina Proprietary Part  
750 #15031942v03, February 2018. [https://support.illumina.com/content/dam/illumina-](https://support.illumina.com/content/dam/illumina-support/documents/documentation/chemistry_documentation/samplepreps_nextera/nextera-xt/nextera-xt-library-prep-reference-guide-15031942-03.pdf)  
751 [support/documents/documentation/chemistry\\_documentation/samplepreps\\_nextera/nexter](https://support.illumina.com/content/dam/illumina-support/documents/documentation/chemistry_documentation/samplepreps_nextera/nextera-xt/nextera-xt-library-prep-reference-guide-15031942-03.pdf)  
752 [a-xt/nextera-xt-library-prep-reference-guide-15031942-03.pdf](https://support.illumina.com/content/dam/illumina-support/documents/documentation/chemistry_documentation/samplepreps_nextera/nextera-xt/nextera-xt-library-prep-reference-guide-15031942-03.pdf) accessed 2 August 2018.

- 753 Kircher M, Sawyer S, Meyer M (2012) Double indexing overcomes inaccuracies in multiplex  
754 sequencing on the Illumina platform. *Nucleic Acids Research*, **40**, e3. doi:  
755 10.1093/nar/gkr771
- 756 Kozerewa I, Ning Z, Quail MA, et al. (2009) Amplification-free Illumina sequencing-library  
757 preparation facilitates improved mapping and assembly of (G+C)-biased genomes.  
758 *Nature Methods*, **6**, 291-295. doi: 10.1038/nmeth.1311
- 759 Larsson AJ, Stanley G, Sinha R, Weissman IL, Sandberg R (2018) Computational correction of  
760 index switching in multiplexed sequencing libraries. *Nature Methods*, **15**(5): 305-307.  
761 doi: 10.1038/nmeth.4666
- 762 MacConaill LE, Burns RT, Nag A, et al. (2018) Unique, dual-indexed sequencing adapters with  
763 UMIs effectively eliminate index cross-talk and significantly improve sensitivity of  
764 massively parallel sequencing. *BMC Genomics*, **19**:30, 1-10. doi: 10.1186/s12864-017-  
765 4428-5
- 766 McCormack JE, Harvey MG, Faircloth BC, et al. (2013) A phylogeny of birds based on over  
767 1,500 loci collected by target enrichment and high-throughput sequencing. *PLoS ONE*, **8**,  
768 e54848. doi: 10.1371/journal.pone.0054848
- 769 McGee MD, Faircloth BC, Borstein SR, Zheng J, Hulsey CD, Wainwright PC, Alfaro ME  
770 (2016) Replicated divergence in cichlid radiations mirrors a major vertebrate innovation.  
771 *Proceedings of the Royal Society of London: Biological Sciences*, **283**, 20151413. doi:  
772 10.1098/rspb.2015.1413
- 773 Meece JK, Anderson JL, Klein BS *et al.* (2010) Genetic Diversity in *Blastomyces dermatitidis*:  
774 Implications for PCR detection in clinical and environmental samples. *Medical Mycology*,  
775 **48**, 285-290.
- 776 Meyer M, Kircher M (2010) Illumina sequencing library preparation for highly multiplexed  
777 target capture and sequencing. Cold Spring Harbor Protocol, 2010, pdb prot5448. doi:  
778 10.1101/pdb.prot5448
- 779 Meyer M, Stenzel U, Myles S, et al. (2007) Targeted high- throughput sequencing of tagged  
780 nucleic acid samples. *Nucleic Acids Research*, **35**, e97. doi: 10.1093/nar/gkm566
- 781 Rohland N, Reich D (2012) Cost-effective, high-throughput DNA sequencing libraries for  
782 multiplexed target capture. *Genome Research*, **22**, 939-946. doi: 10.1101/gr.128124.111
- 783 Shoemaker DD, Lashkari DA, Morris D, Mittmann M, Davis RW (1996) Quantitative  
784 phenotypic analysis of yeast deletion mutants using a highly parallel molecular bar-  
785 coding strategy. *Nature Genetics*, **14**,450-456. doi: 10.1038/ng1296-450
- 786 Skerra A (1992) Phosphorothioate primers improve the amplification of DNA sequences by  
787 DNA polymerases with proofreading activity. *Nucleic Acids Research*, **20**, 3551-3554.  
788 doi: 10.1093/nar/20.14.3551
- 789 Smith BT, Harvey MG, Faircloth BC, et al. (2014) Target capture and massively parallel  
790 sequencing of ultraconserved elements (UCEs) for comparative studies at shallow  
791 evolutionary time scales. *Systematic Biology*, **63**, 83-95. doi: 10.1093/sysbio/syt061

- 792 Syed F, Grunenwald H, Caruccio N (2009) Next-generation sequencing library preparation:  
793 Simultaneous fragmentation and tagging using *in vitro* transposition. *Nature Methods*  
794 *Application Note 6*. <http://www.nature.com/nmeth/journal/v6/n11/full/nmeth.f.272.html>.  
795 doi: 10.1038/nmeth.f.272
- 796 Tautz D, Ellegren H, Weigel D (2010) Next generation molecular ecology. *Molecular Ecology*,  
797 **19 s1**, 1-3. doi: 10.1111/j.1365-294X.2009.04489.x.

# iTru Library Method

Fragmented  
DNA sample

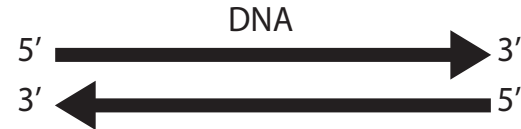

end repair  
3'+A

T/A  
overhangs  
not shown

Ligate stubby  
Y-yoke adapters

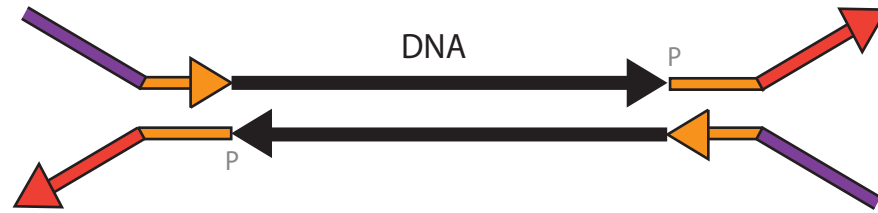

Limited cycle PCR

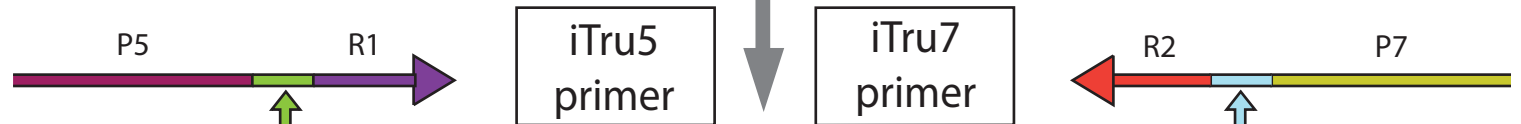

Full-length &  
double indexed

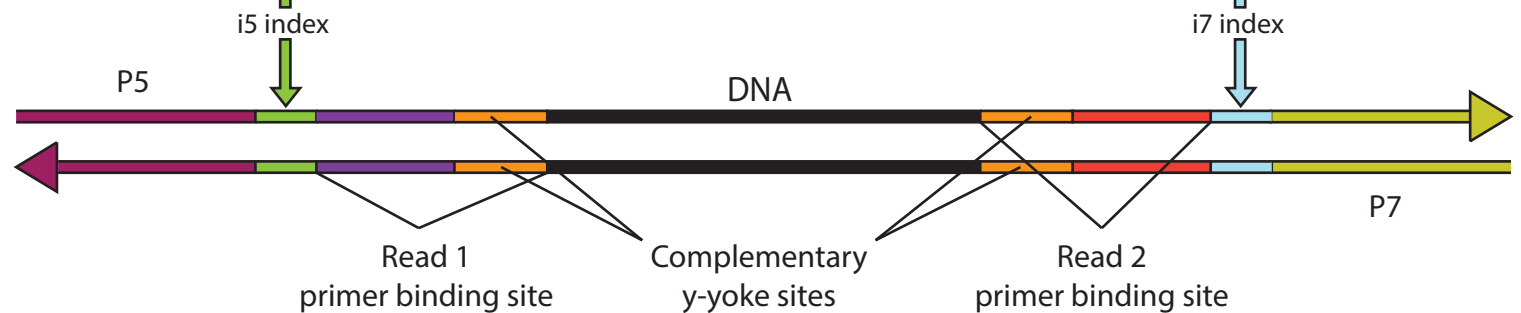

Fragmented DNA

bioRxiv preprint doi: <https://doi.org/10.1101/049114>; this version posted March 5, 2019. The copyright holder for this preprint (which was not certified by peer review) is the author/funder. All rights reserved. No reuse allowed without permission.

End Repair (blunt)

iTru

iNext

+A on 3' end

+C on 3' end

iTru Adapter Ligation

iNext Adapter Ligation

Post-Ligation Cleanup

Post-Ligation Cleanup

Dual-SPRI Size Selection

Dual-SPRI Size Selection

PCR with iTru primers

PCR with iNext primers

Quantify & Sequence

Quantify & Sequence

# Detailed View of iTru Library Method

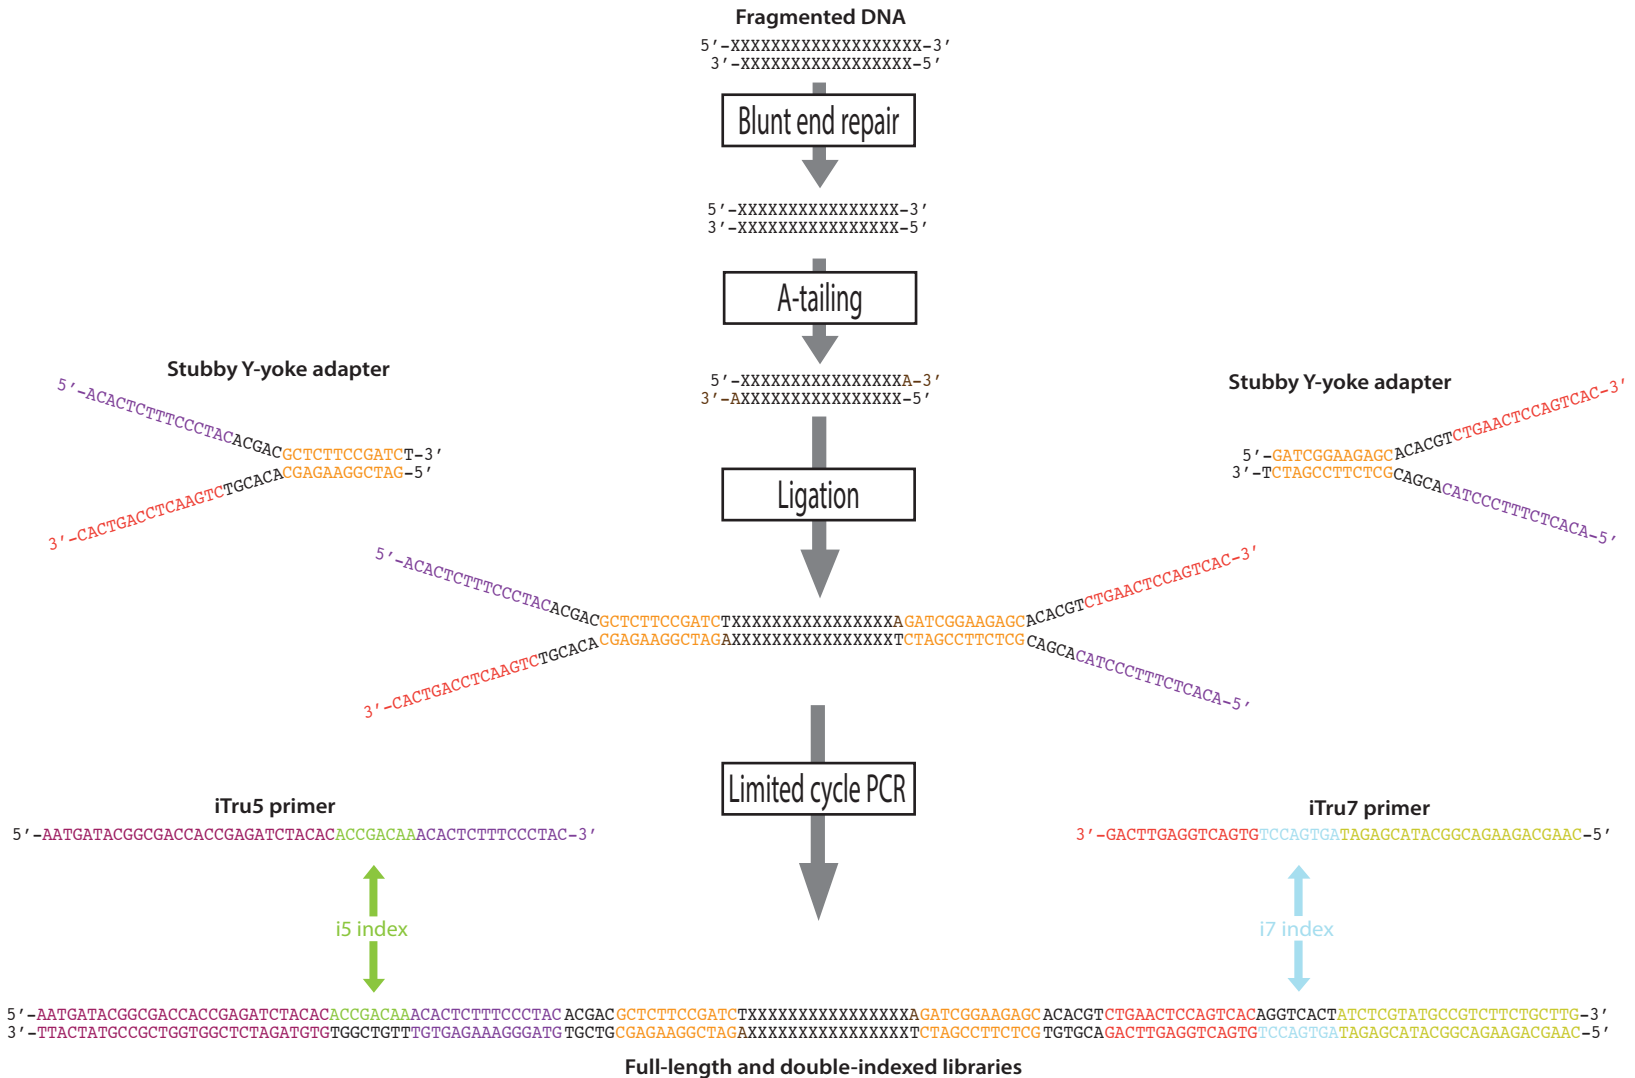

Full-length and double-indexed libraries



# Sequencing Reads for Paired-End and Dual-Indexes

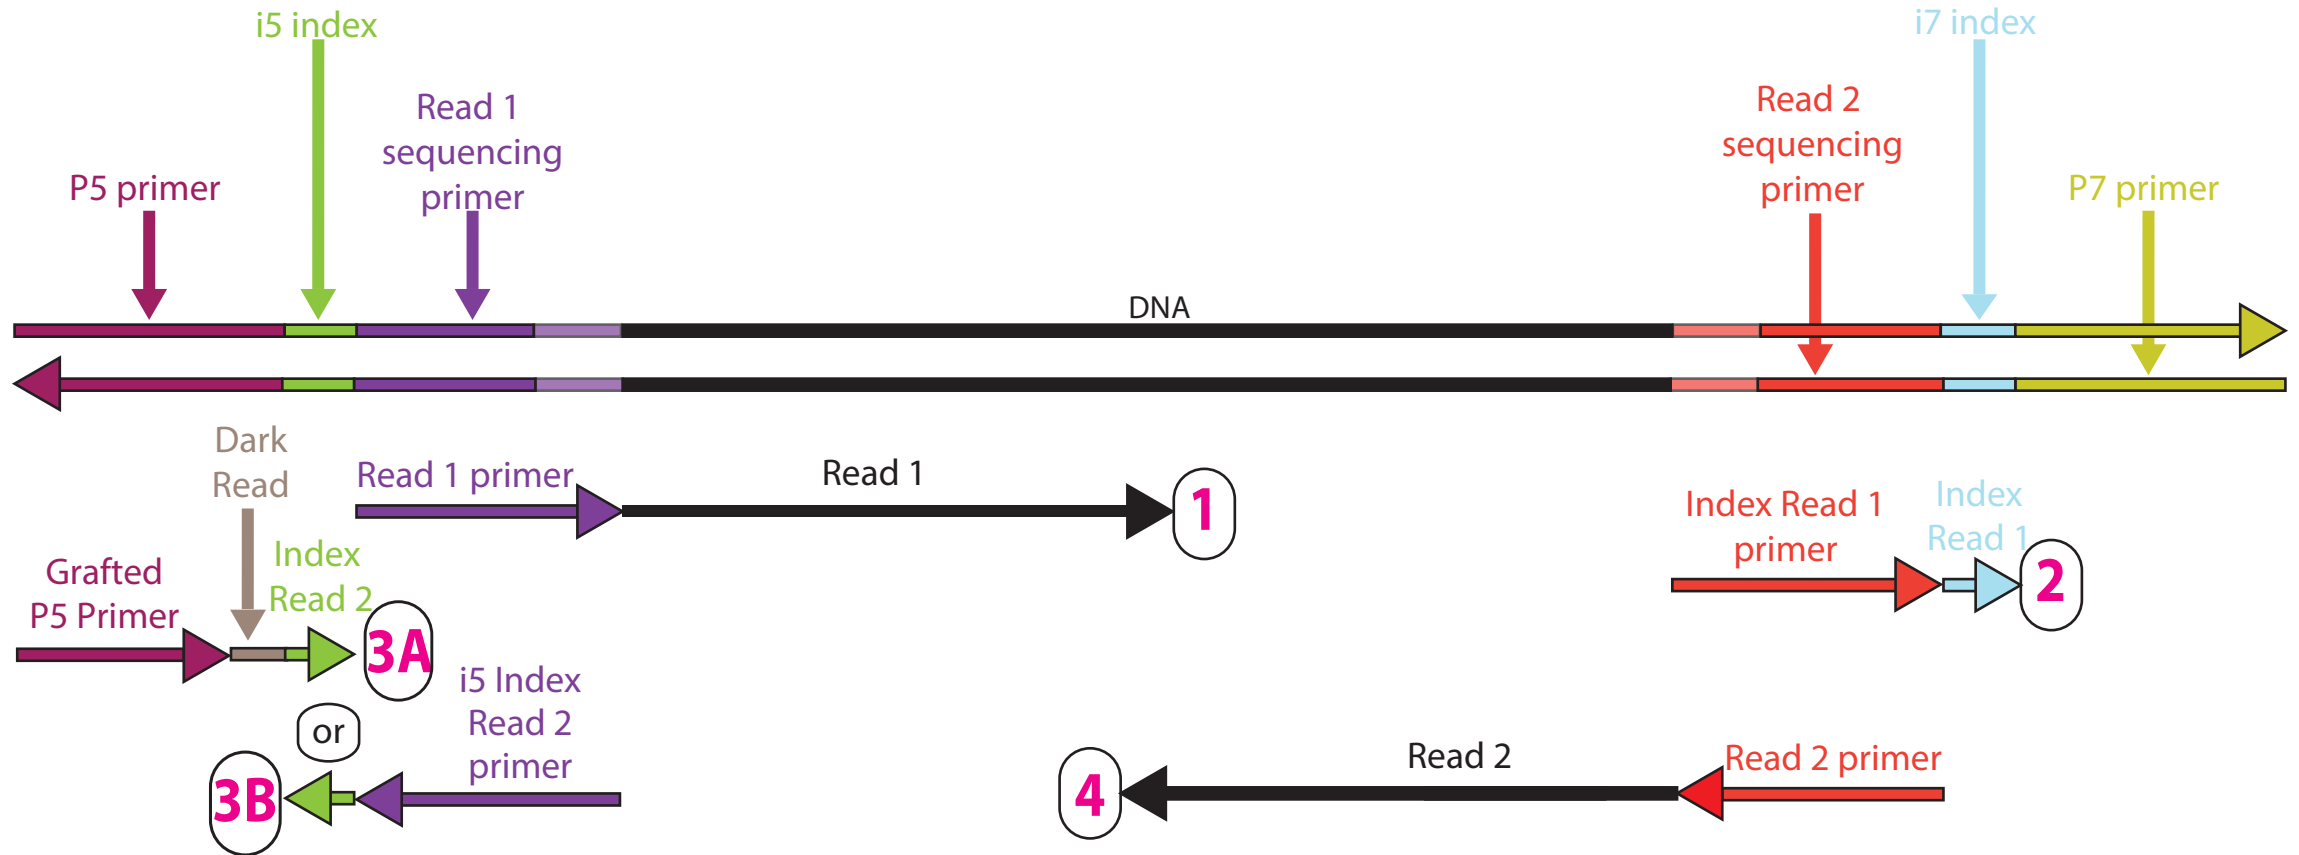

**Table 1:**  
**Comparison of oligonucleotide numbers and costs when using varying numbers of independent tags.**

Cost estimates assume 2-stage library preparations and list prices from Integrated DNA Technologies, 25 nmole synthesis scale, with oligonucleotides delivered in plates. An index length of 8 nucleotides is used with an edit distance  $\geq 3$  for iTru and an edit distance  $\geq 2$  for Illumina.

| Uniquely Indexed Libraries | Library Type      | Index Positions | Stub Adapter Oligos | Long Adapter Oligos   | Indexed Primers       | Adapter Cost + Primer Cost (US \$) |
|----------------------------|-------------------|-----------------|---------------------|-----------------------|-----------------------|------------------------------------|
| 96                         | TruSeq*           | 1               | 0                   | 1+96                  | 0 [2 <sup>#</sup> ]   | \$4,019 + \$18                     |
| 96                         | TruSeq Nano HT    | 2               | 0                   | 8 + 12                | 0 <sup>§</sup>        | \$4,560 <sup>§</sup> + \$0         |
| 96                         | iTru <sup>a</sup> | 1               | 2                   | 0                     | 1 + 96                | \$45 + \$1,617                     |
| 96                         | iTru <sup>b</sup> | 2               | 2                   | 0                     | 8 + 12                | \$45 + \$344                       |
| 384                        | TruSeq*           | 1               | 0                   | 1+384                 | 0 [2 <sup>#</sup> ]   | \$16,029 + \$18                    |
| 384                        | iTru <sup>a</sup> | 1               | 2                   | 0                     | 1 + 384               | \$45 + \$6,416                     |
| 384                        | iTru <sup>b</sup> | 2               | 2                   | 0                     | 16+24                 | \$45 + \$689                       |
| 9216                       | TruSeq*           | 1               | 0                   | 1 + 9216 <sup>c</sup> | 0 [2 <sup>#</sup> ]   | \$392,049 + \$18                   |
| 9216                       | iTru <sup>a</sup> | 1               | 2                   | 0                     | 1 + 9216 <sup>c</sup> | \$45 + \$153,539                   |
| 9216                       | iTru <sup>b</sup> | 2               | 2                   | 0                     | 96+96                 | \$45 + \$3,333                     |
| 74,304                     | iTru <sup>b</sup> | 2               | 2                   | 0                     | 192 + 387             | \$45 + \$9,915                     |

\* Original TruSeq approach with custom adapters (cf. Faircloth & Glenn, 2012); kits are no longer available, but the method can be home-brewed (cf. Fisher et al., 2010), or the adapters can be used with reagents from TruSeq Nano kits.

<sup>#</sup> P5 and P7 primers are used.

<sup>§</sup> Price includes all library preparation reagents, not just adapters; P5 and P7 primers are included in kit.

<sup>a</sup> Libraries contain both i5 and i7 tags, but only one iTru5 primer is used for all samples, thus only the i7 tags are informative and are sequenced (cost efficient with old versions of HiSeq  $\leq 2500$  kits). This method is no longer recommended, but illustrates cost differences.

<sup>b</sup> Both the i5 and i7 indexes are informative and are sequenced.

<sup>c</sup> Tags of 11 nucleotides are required for 9216 tags of edit distance  $\geq 3$ .

**Table 2:**  
**Comparison of Nextera, iNext, iTru, and TruSeq Nano HT library preparation methods.**

| <b>Library Type</b>              | <b>Nextera</b>                                             | <b>iNext</b>                 | <b>iTru</b>                  | <b>TruSeq Nano HT</b>                                                  |
|----------------------------------|------------------------------------------------------------|------------------------------|------------------------------|------------------------------------------------------------------------|
| <b>Input DNA (ng)</b>            | Intact ( $\geq 50$ )                                       | Sheared ( $\geq 100^{\#}$ )  | Sheared ( $\geq 100^{\#}$ )  | Sheared ( $\geq 100$ )                                                 |
| <b>Repair ends</b>               | N/A                                                        | Yes                          | Yes                          | Yes                                                                    |
| <b>Add DNA overhang</b>          | N/A                                                        | C                            | A                            | A                                                                      |
| <b>Ligate adapter</b>            | Tagmentation                                               | iNext stub                   | iTru stub                    | TruSeq                                                                 |
| <b>Limited cycle PCR primers</b> | Nextera or iNext*                                          | Nextera or iNext             | iTru                         | P5 and P7                                                              |
| <b>Advantages</b>                | Least time                                                 | Lower cost, high diversity   | Lower cost, high diversity   | Industry standard                                                      |
| <b>Disadvantages</b>             | Higher cost, lower diversity, less randomness <sup>§</sup> | More prep. time than Nextera | More prep. time than Nextera | Higher cost, more input DNA, more prep. time; not for sequence capture |

\* Note, iNext primers are not specified as biotinylated, and thus will not work interchangeably with Nextera libraries that use streptavidin beads to capture/normalize/purify libraries unless biotins are added. Using unmodified iNext primers requires other purification and normalization procedures.

<sup>§</sup> Tagmentation does not insert adapters into the genome as randomly as shearing the DNA.

<sup>#</sup> Hyper Prep Plus Kits (KapaBioSciences) allow input as low as 1 ng of intact DNA.

**Table 3:**

**iTru and iNext adapter stub oligonucleotides and tagged primer sequences.**

All sequences are given in 5' to 3' orientation. To make it clear which portions are constant among all tagged primers, as well as to identify function, the tagged primers are given in three pieces (the invariant 5' end, the tag sequence which varies among primers, and the invariant 3' end), but the primers are obtained as a single contiguous fusion of these three pieces. Complete balanced sets of primers are available as Supplemental Files (4, 15). Adapter stub oligonucleotides must be hydrated and annealed prior to use (Supplemental File 7).

| <b>iTru</b>    |                    |                                          |                     |                  |                   |
|----------------|--------------------|------------------------------------------|---------------------|------------------|-------------------|
| <b>Adapter</b> | <b>Stub name</b>   | <b>Stub sequence</b>                     |                     |                  |                   |
|                | iTru_R2_stub_RCp   | /5Phos/GATCGGAAGAGCACACGTCTGAACTCCAGTCAC |                     |                  |                   |
|                | iTru_R1_stub       | ACACTCTTTCCCTACACGACGCTCTTCCGATCT        |                     |                  |                   |
|                | <b>Primer Name</b> | <b>5' end</b>                            | <b>Tag Sequence</b> | <b>3' end</b>    | <b>Tag number</b> |
| <b>i5</b>      | iTru5_01_A         | AATGATACGGCGACCACCGAGATCTACAC            | ACCGACAA            | ACACTCTTTCCCTA*C | tag063            |
|                | iTru5_01_B         | AATGATACGGCGACCACCGAGATCTACAC            | AGTGGCAA            | ACACTCTTTCCCTA*C | tag134            |
| <b>i7</b>      | iTru7_01_01        | CAAGCAGAAGACGGCATAACGAGAT                | AGTGACCT            | GTGACTGGAGTTCA*G | tag132            |
|                | iTru7_01_02        | CAAGCAGAAGACGGCATAACGAGAT                | AACAGTCC            | GTGACTGGAGTTCA*G | tag008            |

  

| <b>iNext</b>   |                    |                                          |                     |                 |                   |
|----------------|--------------------|------------------------------------------|---------------------|-----------------|-------------------|
| <b>Adapter</b> | <b>Stub name</b>   | <b>Stub sequence</b>                     |                     |                 |                   |
|                | iNext_R2_stub_RCp  | /5phos/TGTCTCTTATACACATCTCCGAGCCCACGAGAC |                     |                 |                   |
|                | iNext_R1_stub      | TCGTCCGGCAGCGTCAGATGTGTATAAGAGACAG       |                     |                 |                   |
|                | <b>Primer Name</b> | <b>5' end</b>                            | <b>Tag Sequence</b> | <b>3' end</b>   | <b>Tag number</b> |
| <b>i5</b>      | iNext5_01_A        | AATGATACGGCGACCACCGAGATCTACAC            | GACACAGT            | TCGTCCGGCAGCGTC | tag317            |
|                | iNext5_01_B        | AATGATACGGCGACCACCGAGATCTACAC            | GCATAACG            | TCGTCCGGCAGCGTC | tag348            |

|    |              |                           |          |                 |        |
|----|--------------|---------------------------|----------|-----------------|--------|
| i7 | iNext7_01_01 | CAAGCAGAAGACGGCATAACGAGAT | TCACCTAG | GTCTCGTGGGCTCGG | tag458 |
|    | iNext7_01_02 | CAAGCAGAAGACGGCATAACGAGAT | CAAGTCGT | GTCTCGTGGGCTCGG | tag172 |

**Table 4:**

**Results from initial iTru library preparation and sequencing tests of DNA from sharks and challenging non-model organisms.**

The Illumina i7 index sequences were used in these tests. Protocol 1: EZNA Tissue DNA KIT (Omega Bio-Tek, USA); Protocol 2: Aljanabi & Martínez (1997); Protocol 3: CTAB-Phenol.

| Sample ID | Common Name          | Species                         | DNA Extraction Method | i7 Index ID | Raw Index Count | Number of Read Pairs | Primary Objective | Usable Reads | mtDNA contig size in bp (mean coverage) | putative mtDNA contig size in bp (mean coverage) | Microsats Identified <sup>2</sup> |
|-----------|----------------------|---------------------------------|-----------------------|-------------|-----------------|----------------------|-------------------|--------------|-----------------------------------------|--------------------------------------------------|-----------------------------------|
| MaF 5     | white shark          | <i>Carcharodon carcharias</i>   | Protocol 1            | 705         | 1,930,539       | 1,805,638            | mtDNA             | 1,722,562    | 17,103 (46x) <sup>3</sup>               | -                                                | -                                 |
| MaF 19    | white shark          | <i>Carcharodon carcharias</i>   | Protocol 2            | 707         | 2,075,236       | 1,927,792            | mtDNA             | 2,003,858    | 17,138 (31x) <sup>3</sup>               | -                                                | -                                 |
| MaF 10    | silky shark          | <i>Carcharhinus falciformis</i> | Protocol 1            | 706         | 1,438,468       | 1,358,550            | mtDNA             | 1,800,534    | 17,285 (22x) <sup>4</sup>               | -                                                | -                                 |
| MaF 1     | Tarantula            | <i>Brachypelma vagans</i>       | Protocol 1            | 701         | 985,171         | 934,406              | msats             | 80,790       | -                                       | -                                                | 563                               |
| MaF 16    | cannonball jellyfish | <i>Stomolophus spp.</i>         | Protocol 3            | 703         | 959,516         | 909,401              | msats             | 591,608      | -                                       | -                                                | 92,668                            |
| MaF 9     | Coral                | <i>Poritespanamensis</i>        | Protocol 1            | 702         | 3,449,711       | 3,298,155            | msats             | 1,549,718    | 18,628 (50x) <sup>5</sup>               | -                                                | 7.322                             |
| Total     |                      |                                 |                       |             |                 | 10,838,641           | 10,233,942        |              |                                         |                                                  |                                   |

<sup>1</sup> Only includes high quality reads with inserts of 250 bases; excluded reads generally due to short insert length due to degraded input DNA.

<sup>2</sup> Identified using default parameters in PAL-finder (Castoe et al., 2012).

<sup>3</sup> Díaz-Jaimes et al. (2016)

<sup>4</sup> Galván-Tirado et al. (2016)

<sup>5</sup> Del Rio-Portilla et al. (2016)
